# Supplementary material for: Safety and Efficacy of Teneligliptin in Patients with Type 2 Diabetes Mellitus and Impaired Renal Function: Interim Report from Post-marketing Surveillance
Source: Springer Nature journal article supplement (doi:10.1007/s13300-018-0416-2), 2018-04-10
Supplement: MOESM1 [file 15604464]

## Safety and Efficacy of Tenelegliptin in Patients with Type 2 Diabetes Mellitus and Impaired Renal Function: Interim Report from Post-marketing Surveillance

腎機能障害を有する 2 型糖尿病患者におけるテネリグリプチンの安全性および有効性：市販後調査中間報告

### 抄録

**背景：**テネリグリプチンは、2 型糖尿病（T2DM）患者の治療薬として新規に開発された経口ジペプチジルペプチダーゼ-4 阻害薬である。テネリグリプチンの安全性および有効性については複数の臨床試験において示されているものの、中等度または高度の腎機能障害を有する患者に対する使用を支持するデータは限られている。腎機能障害を有する日本人 T2DM 患者におけるテネリグリプチン長期使用の安全性および有効性の検討を目的として、テネリグリプチンの市販後調査「RUBY」（exploRing the long-term efficacy and safety included cardiovascular events in patients with type 2 diabetes treated by tenelegliptin in the real-world）の中間解析を実施した。

**方法：**本解析では、2013 年 5 月から 2017 年 6 月までに RUBY 調査にて入手された調査票のデータを使用した。テネリグリプチン治療開始時の推算糸球体濾過量（eGFR）に基づいて慢性腎臓病のステージを G1～G5 に分類し、サブグループごとの安全性および有効性を評価した。さらに透析患者についても評価した。副作用の発現状況により安全性を評価し、テネリグリプチン投与開始後 2 年までの血糖コントロールを評価した。

**結果：**本調査では合計 11,677 例の患者が登録され、本中間解析では 11,425 例についての調査票を対象とした。各サブグループでの副作用発現割合は 2.98～6.98% であり、低血糖や腎機能障害を含む副作用プロファイルに関してサブグループ間の差は認められなかった。ベースライン補正したテネリグリプチン投与開始後 1 年および 2 年時点の HbA1c 変化量の最小二乗平均は、各 eGFR 群でそれぞれ -0.68～-0.85% および -0.71～-0.85% であった。透析患者に対するテネリグリ

プチンによる治療では、グリコアルブミン濃度の低下または低下傾向が認められた（1年後：-2.29%（ $p < 0.001$ ），2年後：-1.64%（ $p = 0.064$ ））。

**結論：**長期治療において、テネリグリプチンの使用は正常から透析を含む末期腎不全までのいずれの腎機能障害のステージの患者においても概して良好に忍容され、血糖コントロールを改善した。

**臨床試験登録番号：**Japic CTI-153047

**資金提供：**田辺三菱製薬株式会社，第一三共株式会社

**キーワード：**透析，ジペプチジルペプチダーゼ-4阻害薬，市販後調査，腎機能障害，テネリグリプチン，2型糖尿病

## 背景

2型糖尿病（T2DM）は、今後十年間、世界的に大きな健康問題となると予測されている [1] . 日本においても、2016年の厚生労働省国民健康・栄養調査報告において、糖尿病が強く疑われる者、糖尿病の可能性を否定できない者がそれぞれ1千万人存在すると推定されている [2] .

糖尿病治療ガイドラインでは、糖尿病性合併症のリスク低減を目的として血糖値のコントロール目標が設定されている [3-5] . 糖尿病患者は、血糖コントロール不良および／または、高血圧や加齢によるネフロン減少などの合併による微小血管障害により、慢性腎臓病（CKD）を発症するリスクが高い [6, 7] . 日本の透析患者における主な透析理由は、糖尿病性腎症が最も多い [8] . 腎機能障害を有する T2DM 患者では、特にインスリンクリアランスの低下と腎臓の糖新生障害等によって、低血糖を発現するリスクが高まる [9] . また、CKDの進行に伴う糸球体濾過率(GFR)の低下によって、良好な血糖コントロールを達成するための治療選択肢が制限される。なぜなら、このような患者では、腎排泄されるいくつかの糖尿病治療薬は尿中に排泄されにくくなり、曝露が増加する可能性があるからである [10] . そのため、CKDが進行した患者に対しては、いくつかの糖尿病治療薬の使用は禁忌となるか投与量の減量が必要となる [11] .

ジペプチジルペプチダーゼ-4（DPP-4）阻害薬は、比較的新しい種類の糖尿病治療薬である。これらの薬剤は、DPP-4によるグルカゴン様ペプチド-1（GLP-1）等のインクレチンホルモンの分解を阻害することで、膵臓β細胞からのインスリン分泌をグルコース依存的に促進する [12] . DPP-4阻害薬は低血糖発現リスクが低いということが重要な点であり [12] , DPP-4阻害薬が血糖コントロールの改善だけでなく腎臓および心血管の保護などの多面的な効果を有する可能性についてのエビデンスも報告されている [13-15] .

DPP-4阻害薬であるテネリグリプチンは、日本では2012年からT2DM治療薬として処方されている [16] . 通常1日1回20 mgを投与するが、血糖コントロールが得られない場合は、通常

用量の2倍（1日1回40mg）に増量できる [17]。テネリグリプチンは腎機能障害を有する T2DM 患者（透析患者を含む）にも投与が可能であり、投与量の減量の必要もない [18, 19]。韓国では 2014 年にテネリグリプチンの処方開始されている [20]。

日本人 T2DM 患者におけるテネリグリプチンの安全性と有効性は、単独療法 [21-23] やピオグリタゾン、メトホルミン、グリメピリド、インスリン、カナグリフロジン、グリニド薬、 $\alpha$ -グルコシダーゼ阻害薬との併用療法についても、最長 52 週間の臨床試験において確認されている [23-27]。

しかし、これまでに実施された日本人患者を対象としたテネリグリプチンの臨床試験では、中等度から高度の腎機能障害を有する患者数は限られており [23]，結果として、この患者集団におけるテネリグリプチンの安全性および有効性に関する情報は十分ではない。この点に対応すべく、2013 年 5 月より 10,000 例を超える日本人 T2DM 患者を対象として、日常診療におけるテネリグリプチンの市販後調査（PMS）「RUBY」（exploRing the long-term efficacy and safety included cardiovascular events in patients with type 2 diabetes treated by teneligliptin in the real-world）が実施されている [28]。

この中間解析では、2013 年 5 月から 2017 年 6 月までの間に RUBY にて収集された調査票を用いて、腎機能障害を有する T2DM 患者集団におけるテネリグリプチン長期使用の安全性および有効性について評価した。

## 方法

### 市販後調査「RUBY」デザイン：患者と方法

実施中の RUBY (JapicCTI-153047) では、テネリグリプチンの投与を開始し、長期の経過観察が可能な日本人 T2DM 患者を対象とした [28]。テネリグリプチンによる治療の開始は、承認された添付文書に沿って医師が決定した。テネリグリプチンは 1 日 1 回投与され、投与量および用量調節についてはすべて処方医師が添付文書に沿って判断した。

調査は 2013 年 5 月に開始された。患者登録は 2013 年 5 月から 2015 年 2 月の間に中央登録方式にて行われ、追跡期間は最長で 3 年間としている。

患者データの収集にはオンライン電子データ収集システムを用いた。参加医師はテネリグリプチン投与開始前に患者の人口統計学的特性およびベースライン所見を記録し、テネリグリプチンを使用する登録患者全例について最大で 3 年間追跡した。調査票データには、前治療薬、併用薬、血糖コントロールに関するテネリグリプチンへの反応性、有害事象等が含まれた。

RUBY のプロトコルは日本政府の厚生労働省に承認された。RUBY は田辺三菱製薬株式会社が、日本の医薬品の製造販売後の調査及び試験の実施の基準に関する省令 (GPSP) を遵守して実施した。

### 腎機能障害を有する T2DM 患者集団を対象とした中間解析

本解析には、2013 年 5 月から 2017 年 6 月までの間に収集された調査票データを用いた。調査票に記録された年齢、性別、血清クレアチニン濃度に基づいて推算 GFR (eGFR) を算出した。血清クレアチニン値が得られなかった患者については、eGFR を算出しなかった。

腎機能のベースラインデータを有する患者を、テネリグリプチン治療開始時の透析治療の有無によって分類した。また、テネリグリプチン治療開始時の eGFR が算出可能だった非透析患者

について、CKD ステージ分類 [29] を用いて腎機能ごとに次のように分類した： (i) 正常または高値 (G1 : eGFR  $\geq 90$  mL/min/1.73m<sup>2</sup>) , (ii) 軽度低下 (G2 : eGFR  $\geq 60$  - < 90 mL/min/1.73m<sup>2</sup>) , (iii) 軽度～中等度低下 (G3a : eGFR  $\geq 45$  - < 60 mL/min/1.73m<sup>2</sup>) , (iv) 中等度～高度低下 (G3b : eGFR  $\geq 30$  - < 45 mL/min/1.73m<sup>2</sup>) , (v) 高度低下 (G4 : eGFR  $\geq 15$  - < 30 mL/min/1.73m<sup>2</sup>) , (vi) 腎不全 (G5 : eGFR < 15 mL/min/1.73m<sup>2</sup>) .

テネリグリプチンの安全性および有効性をサブグループごとに検討した。安全性は、調査期間中に報告された副作用を基に評価した。テネリグリプチンとの因果関係が否定できない、または不明な有害事象を副作用と定義した。医師は副作用の種類、重症度、テネリグリプチンとの因果関係を報告した。血糖値が 50 mg/dL 以下の場合および医師が重篤と判断した低血糖を重篤な低血糖と定義した。

血糖コントロールにおける有効性については、非透析患者ではグリコヘモグロビン (HbA1c) , 透析患者ではグリコアルブミン (GA) の経時変化を評価した。HbA1c または GA の測定はテネリグリプチン治療開始後 0, 3, 6, 12, 18, 24 ヶ月時点で実施した。臨床検査は、調査参加施設で通常行われている測定法を用いて実施した。

## データ解析方法

連続データは症例数 (n) , 平均値, 標準偏差 (SD) にて示し, 分類データは各カテゴリーでの n およびパーセンテージで示した。HbA1c の変化量については、投与前値を共変量とした最小二乗平均値 (LS MEAN) および標準誤差 (SE) を算出した。また、1 標本 t 検定を用いてテネリグリプチン投与前後の差を評価した。臨床検査値は、テネリグリプチン投与前後の両方のデータを有している患者についてのみ集計した。各 eGFR カテゴリー間の副作用の発現頻度の差について、カイ二乗検定を用いて解析した。さらに、各 eGFR サブグループにおける副作用発現率のリスク比の 95%信頼区間 (CI) を用いて、G2～G5 サブグループと G1 サブグループとの差を

評価した。有意水準を 5%とした両側検定を行い、両側 95%信頼区間を算出した。統計解析には SAS 9.1.3 バージョン以上 (SAS Institute Inc., Cary, NC, USA) を用いた。

副作用は、ICH 国際医薬用語集日本語版 (MedDRA/J) version 20.0 [医薬品医療機器レギュラトリーサイエンス財団, 東京, 日本] を用いて分類した。低血糖, 皮膚疾患, 消化器障害, 肝機能障害, 腎機能障害, 心血管系イベント, 悪性腫瘍に関する副作用を注目すべき副作用と定義した (これらはあらかじめ, 糖尿病, 血糖降下薬, または DPP-4 阻害薬に関連する副作用として設定)。

## 結果

### 患者

RUBY では 1,755 施設から合計 11,677 例の患者が登録され、11,425 例の調査票が本中間解析に用いられた。2017 年 6 月 28 日時点で、調査への参加を中止した患者の割合は 26.9%であり、各サブグループ間（G1～G5 および透析群）で同程度だった。安全性解析対象集団の患者 10,532 例のうち、2017 年 6 月 28 日までに評価可能な調査票が入手できた患者は、eGFR が算出可能な非透析患者 9,234 例およびテネリグリプチン投与開始時に透析を受けていた患者 152 例だった

**(Electronic supplementary material (S1) ) .**

eGFR が算出可能だった患者 9,234 例のうち、大部分の患者は軽度の腎機能低下（G2 : 53.4%）を有していた。腎機能が正常または高値（G1）の患者は 21.5%，軽度～中等度の腎機能低下（G3a）は 16.2%，中等度～高度の低下（G3b）は 6.0%，高度低下（G4）は 2.3%，腎不全（G5）は 0.6%だった。

各サブグループにおける患者の特性および T2DM，高血圧，脂質異常症に対する併用薬使用状況を **Table 1** に示す。高度の腎機能障害患者および透析患者では、腎機能が正常／高値の患者や軽度の患者（G1 : 19.4%，G2 : 21.5%）と比較し、T2DM 罹患期間が長く、糖尿病性合併症の既往割合も高かった（G4 : 74.9%，G5 : 70.0%，透析患者 : 92.8%）。また高度の腎機能障害患者および透析患者が合併症として心筋梗塞や狭心症，心不全などの心疾患（G4 : 40.5%，G5 : 33.3%，透析患者 : 46.1%）や高血圧（G4 : 91.2%，G5 : 88.3%，透析患者 : 89.5%）を有する患者の割合は、腎機能が正常／高値の患者および軽度低下の患者（G1 : 7.8%および 50.9%，G2 : 15.4%および 61.5%）と比較して高かった。

調査期間中、T2DM に対する単独療法としてテネリグリプチンが処方されていた患者は、eGFR が算出可能なサブグループ全体で 40.0～53.3%，透析患者群で 53.9%だった。残りの 46.1～60.0%の患者では、テネリグリプチンは他の糖尿病治療薬（**Table 1**）と併用して処方されてい



た。テネリグリブチンの平均開始用量は、全ての eGFR サブグループで 20.1~20.2 mg/日、透析患者群で 20.3 mg/日だった (Table 1)。調査期間中の平均 1 日投与量は、eGFR サブグループで 20.3~20.7 mg/日、透析患者群で 21.3 mg/日であった (Table 1)。

## 安全性

安全性解析対象集団において、各サブグループのテネリグリブチンの平均投与期間は、534 日~617 日であった [G1 : 581.45±340.90 日, G2 : 610.56±340.87 日, G3a : 616.80±336.73 日, G3b : 594.93±341.58 日, G4 : 561.54±341.68 日, G5 : 533.62±345.22 日, 透析群 : 580.91±371.74 日 (平均値±SD)]。

Table 2 にすべての副作用および特に重要な副作用の発現割合を示す。副作用の発現割合は、G1 群 [1,982 例中 59 例 (2.98%)] と比較し、G4 および G5 群で高かった [G4 : 215 例中 15 例 (6.98%), G5 : 60 例中 4 例 (6.67%)]。G4 および G5 群で副作用が認められた患者 19 例のうち、6 例の副作用については、処方医師によりテネリグリブチンとの関連性が否定できないと判断された一方で、13 例の副作用についてはテネリグリブチンとの因果関係は不明と評価された。また 19 例で認められた 30 事象のうち 15 事象は他の原因 (併発疾患や併用薬等) にも起因すると評価された。重篤な副作用の発現は、腎機能が正常/高値の患者集団 [G1 : 1,982 例中 11 例 (0.55%)] と比較し、G4 および G5 群で多かった [G4 : 215 例中 10 例 (4.65%), G5 : 60 例中 3 例 (5.00%)]。透析患者 152 例のうち、副作用が 5 例 (3.29%)、重篤な副作用が 1 例 (0.66%) で認められた。

低血糖、皮膚疾患、消化器障害、肝機能障害、腎機能障害、心血管系イベント、悪性腫瘍などの特に重要な副作用の発現割合について、サブグループ間の差は認められなかった (Table 2)。より進行した腎機能障害 (G4, G5, 透析群) の患者 5 例で低血糖が発現した : G4 群では非重篤および重篤な低血糖を発現した患者がそれぞれ 1 例ずつ認められ、G5 群では 1 例が非重篤な低血糖を発現、透析群では 2 例が非重篤な低血糖を発現した。これらの患者全例で他の

T2DM 治療薬が併用されていた（インスリンおよび／またはスルホニル尿素薬：4 例，グリニド薬：1 例）． G4 群で認められた腎機能障害として血尿（n=1），腎障害（n=1），血中クレアチニン濃度上昇（n=1）が報告されたが，報告医師はこれらの事象とテネリグリプチンとの因果関係を不明と判断し，これらの副作用のうち 2 つは他の原因（糖尿病性腎症の合併および脱水）も関与していると判断した．心血管系イベントに関する副作用は 13 例で報告されたが（このうち 10 例は重篤な副作用）， G4， G5，透析群では報告されなかった（**Table 2**）．テネリグリプチンとの関連性がない事象を含めた心血管系イベントに関する有害事象は，68 例で認められた（G1：n=4，G2：n=31，G3a：n=12，G3b：n=11，G4：n=4，G5：n=2，透析群：n=4）．悪性腫瘍に関する副作用は 19 例で報告されたが，全ての事象は報告医師によりテネリグリプチンとの因果関係は不明と判断された．テネリグリプチンとの因果関係がない事象を含めた悪性腫瘍に関する有害事象は，87 例で報告された（G1：n=11，G2：n=38，G3a：n=20，G3b：n=6，G4：n=6，G5：n=1，透析群：n=5）．

サブグループ全体で 5 例以上認められた副作用および 2 例以上認められた重篤な副作用を，基本語（PT, preferred term）ごとに **Electronic supplementary material (S2)** に示す．サブグループ間で安全性プロファイルの大きな違いは認められなかった． G4 および G5 群において，それぞれ 2 例および 9 例の患者が評価期間中に透析を開始した；このうち G5 群の患者 1 例については副作用として報告されたが，医師からはテネリグリプチンとの因果関係は不明として報告された．

各 eGFR サブグループの経時的な eGFR プロファイルを **Fig. 1** に示す．すべてのサブグループにおいて 2 年にわたり腎機能は比較的安定していた．

## 有効性

非透析患者における，テネリグリプチン投与開始後 2 年間の各 eGFR サブグループの HbA1c 値および変化量を **Fig. 2** に示す．ベースライン時の HbA1c 値は腎機能が正常／高値の患者で最

も高く (G1 : 8.50%) , 腎不全患者で最も低かった (G5 : 7.04%) (Fig. 2a) . G1, G2, G3a, G3b, G4 群の患者では, 2年間 HbA1c 値が有意に低下した ( $p < 0.01$ ) (Fig. 2a) ; (2年時点での HbA1c) G1 :  $-1.25 \pm 1.7\%$ , G2 :  $-0.67 \pm 1.25\%$ , G3a :  $-0.51 \pm 1.17\%$ , G3b :  $-0.37 \pm 1.12\%$ , G4 :  $-0.54 \pm 1.13\%$  (すべて  $p < 0.001$ ) . G5 患者において, 投与開始2年時点では HbA1c 値の低下は有意でなかった ( $-0.53 \pm 1.25\%$ ,  $p = 0.074$ ) が, HbA1c 値が低下, または低下する傾向があった. (投与開始2年時点で有意差が認められなかった理由として) ベースライン値が低く, 患者数が限られているためと考えられる. ベースライン時の HbA1c 値を調整するため, 各 eGFR サブグループごとに HbA1c 変化量の最小二乗平均を算出した (Fig. 2b) . 調整の結果, テネリグリプチン開始後, すべてのサブグループで HbA1c 値は低下した. テネリグリプチン投与開始後1年および2年時点での HbA1c 低下量については各 eGFR サブグループ間の有意差は認められず, HbA1c 値は1年時点で  $0.68 \sim 0.85\%$ , 2年時点で  $0.71 \sim 0.85\%$  低下していた.

透析患者における GA の平均値を Fig. 3 に示す. テネリグリプチン投与開始後の GA 値の平均変化量は1年時点で  $-2.29\%$  ( $p < 0.001$ ) , 2年時点で  $-1.64\%$  ( $p = 0.064$ ) だった. テネリグリプチン開始後2年時点の結果については解析可能な患者数が少なく ( $n = 45$ ) 限定的である.

## 考察

本中間解析の目的は、腎機能が低下した T2DM 患者におけるテネリグリプチン長期使用の安全性および有効性の評価である。本解析の結果、各腎機能障害ステージの副作用の発現割合は 2.98～6.98%の範囲内であり、腎機能障害ステージ間で副作用のプロファイルの明らかな差は認められなかった。今回の市販後調査で示された良好な忍容性のプロファイルは、先立って実施された末期腎臓病患者に対するテネリグリプチンの使用に関する探索的研究により裏付けられる [30]。また、2年間のテネリグリプチン治療で、腎機能が正常または高い患者から透析患者を含む末期腎不全患者まで、すべてのサブグループで血糖コントロールが改善されたことが示された。

すべての DPP-4 阻害薬は共通の作用機序を有しているものの、構造は同一ではなく、そのため各 DPP-4 阻害薬の薬物動態的および薬理学的特性は異なっている [31]。排泄経路は違いの 1 つであり、いくつかの DPP-4 阻害薬ではその大部分 (75～87%) が腎臓経路から排泄される [32]。テネリグリプチンの腎クリアランスは約 36%である [31]。よって中等度または高度の腎機能障害患者に対しては、リナグリプチンおよびテネリグリプチンを除くほとんどの DPP-4 阻害薬で用量の調節が必要となる [31, 32]。本中間解析では、各サブグループにおける平均投与期間は 534 日～617 日であり、患者の多くはテネリグリプチンを 20 mg/日で使用した。

一般的に、腎機能障害患者では有害事象のリスクが高くなる [33]。プラセボを投与した T2DM 患者では、有害事象または腎関連の有害事象の発現が eGFR の低下に伴い増加することが示されている [34, 35]。今回の調査において、ベースライン時の腎機能障害がより高度の患者では、腎機能障害が軽度の患者と比較し、糖尿病以外の疾患 (例: 高血圧などの心血管関連の併発疾患) の合併率が概して高くなる傾向が認められた。このことは、本検討で、G4 および G5 群における副作用および重篤な副作用の発現割合が高かったの要因の 1 つである可能性がある。実際に、処方医師はほとんどの副作用について、テネリグリプチンとの因果関係は不明と判断した。この中間解析のリミテーションとして、各サブグループの患者数が異なり、とくに

G5 群の患者数が少なかったこと、また各腎機能障害ステージに対応する対照群がなかったことが挙げられる。これらの理由から、この中間解析の結果に基づいて G4 および G5 患者ではテネリグリプチンによる副作用の発現リスクが増加するとは言いきれない。本解析により、腎機能障害が進行した患者における副作用リスクに関し、さらなる検討が必要であることが示された。

低血糖を含む副作用のプロファイルについて、腎機能障害ステージ間で違いは認められなかった。腎機能が低下した糖尿病患者は、インスリンクリアランスの低下や腎臓での糖新生の障害など、複数の要因によって低血糖を発現しやすい [9]。この中間解析において、低血糖の発現は腎機能障害が進行したステージ (G4, G5, 透析群) の患者では 5 例で認められた。これらの患者の大部分は、低血糖リスクの増加と関連する治療とされるインスリンおよびスルホニル尿素薬を併用していた [36]。よって、腎機能障害を有する T2DM 患者に対しテネリグリプチンを前述の治療と併用する際は、低血糖の発現を避けるために慎重な管理が必要である。

本検討では、治療開始後 2 年時点での HbA1c 値は、各 eGFR サブグループ全体で 0.71%~0.85% (ベースライン HbA1c 調整後の最小二乗平均) の範囲で低下した。本調査において各サブグループで認められた HbA1c の改善は、腎機能障害を有する T2DM 患者に対する DPP-4 阻害薬の有効性を検討した他の研究結果 (HbA1c 低下 : 0.4~0.7%) [37, 38] に類似するものだった。テネリグリプチンは透析 T2DM 患者における血糖コントロールを著しく改善した [30, 39]。さらに、透析患者においてテネリグリプチンは必要インスリン投与量を減少させることが見出されている [40]。透析患者では HbA1c 値が低くなり、実際の血糖コントロールを反映しない場合がしばしばみられる [41]。本検討では、透析患者における血糖コントロールの指標として GA を用いた。日本透析医学会の「血液透析患者の糖尿病治療ガイド 2012 (Best Practice for Diabetic Patients on Hemodialysis 2012)」 [41] では、透析を受ける糖尿病患者における血糖コントロールの暫定目標値として、心血管イベントの既往がない患者で GA 20%未満、心血管イベントの既往を有する患者では GA 24%未満と設定されている。この中間解析では、透析患者の GA 値はベースライン時に 23.74%だったのに対し、テネリグリプチン投与開始 1 年時点で

21.34%，2年時点で21.45%まで低下した。しかし、透析患者から収集された調査票は他のサブグループよりも少なく、さらなる解析が必要である。

ここに報告するデータは臨床試験の一部として対照群との比較下で示されたものではないが、この市販後調査データは、日常診療におけるテネリグリプチン使用、および腎機能障害を有する日本人患者において発現する可能性のある副作用の種類について、重要な洞察を提供している。テネリグリプチン投与後に収集されたデータに、他の併用薬を追加または変更した症例のデータが含まれる点は、本解析の潜在的リミテーションである。これに加え、不完全なデータや報告バイアス、対照群がないこと、結果の一般化における限界など、市販後調査デザインの典型的なリミテーションも存在する。

## 結論

長期間のテネリグリプチン治療について中間解析を行った結果、腎機能障害ステージが異なる患者において類似した副作用のプロファイルが示された。また腎機能障害を有する T2DM 患者において、テネリグリプチンと血糖コントロール改善との関連性が認められた。
